# Functional compatibility between isoform $\alpha$ and $\beta$ of type II DNA topoisomerase

Ayako Sakaguchi\* and Akihiko Kikuchi<sup>‡</sup>

Laboratory of Medical Mycology, Research Institute for Disease Mechanism and Control, Nagoya University Graduate School and Faculty of Medicine, 65 Tsurumai-cho, Showa-ku, Nagoya 466-8550, Japan

\*Present address: Department of Biochemistry and Molecular Biology, University of Geneva, Geneva CH-1211, Switzerland

<sup>‡</sup>Author for correspondence (e-mail: aki@med.nagoya-u.ac.jp)

Accepted 11 November 2003

Journal of Cell Science 117, 1047-1054 Published by The Company of Biologists 2004  
doi:10.1242/jcs.00977

## Summary

DNA topoisomerase II (topo II) plays a crucial role in controlling the conformation of both DNA and whole chromosomes. This activity is essential for several cellular events such as DNA replication, transcription, chromosome condensation and segregation. In mammals, two genes code for isoforms of topo II, termed  $\alpha$  and  $\beta$ . They are similar in primary structure and have almost identical catalytic properties *in vitro*. We transfected HeLa cells with small interfering RNAs (siRNAs) targeted against either topo II $\alpha$  or II $\beta$ , and succeeded in knocking down the expression of the corresponding protein. Chromosomes were condensed and aligned at metaphase in topo II $\alpha$ -knockdown cells.

Although some lagging chromosomes were observed, they were still segregated at anaphase despite the absence of topo II $\alpha$ . When both topo II $\alpha$  and topo II $\beta$  were removed, the segregation of chromosomes was severely arrested, suggesting that topo II $\beta$  could partially substitute for topo II $\alpha$ . Double-knockdown experiments also revealed that topo II was required for shortening of the chromosome axis.

Key words: Chromosome condensation, Chromosome segregation, DNA topoisomerase II $\alpha$ , DNA topoisomerase II $\beta$ , siRNA

## Introduction

DNA topoisomerase II (topo II) is a ubiquitous nuclear enzyme that plays a crucial role in controlling the conformation of both DNA and whole chromosomes. This activity is thought to be an essential aspect of several cellular events (Wang, 1996). Mammalian cells are known to possess two isoforms of topo II,  $\alpha$  and  $\beta$ ; they are similar in primary structure and have almost identical catalytic properties *in vitro* (Austin and Marsh, 1998; Drake et al., 1987; Jenkins et al., 1992). Several lines of evidence suggest that topo II $\alpha$  is the main isoform involved in mitotic processes. First, there is a positive correlation between the cellular concentration of topo II $\alpha$  and the rate of cell proliferation (Drake et al., 1989). Second, the expression of topo II $\alpha$  mRNA is higher in tissues containing proliferating cells (Capranico et al., 1992). Third, the level of topo II $\alpha$  protein peaks at G2/M phase during the cell cycle (Woessner et al., 1991) and, finally, topo II $\alpha$  localizes to the centromeres and axes of metaphase chromosomes (De, 2002). By contrast, the function of topo II $\beta$  at the cellular level remains obscure (Sakaguchi et al., 2001). Topo II inhibitors, such as 2,6-dioxopiperazines (ICRF-159 and ICRF-187) and epipodophyllotoxins (VP-16 and VM-26; Schneider et al., 1990), are commonly used to investigate the roles of topo II (Gorbsky, 1994); however, these drugs inhibit the enzymatic activity of both topo II $\alpha$  and topo II $\beta$ . To investigate the cellular role of each topo II isoform individually, we transfected HeLa cells with siRNA (a short synthetic duplex of 21 nucleotides with 3' overhangs of 2 nucleotides) targeted against either topo II $\alpha$  or topo II $\beta$ . RNAi can be used to suppress selectively the expression of either isoform because

siRNAs are ineffective if one or two of the 21 nucleotides are not complementary to their target (Elbashir et al., 2001; Harborth et al., 2001). Using this method, we show that the chromosomes are condensed in the near absence of topo II $\alpha$ . Surprisingly, although some lagging chromosomes were observed, the cells still managed to segregate them at anaphase. By contrast, topo II $\beta$  was not required for normal mitotic events. Double-knockdown experiments with both topo II $\alpha$  and topo II $\beta$  siRNAs revealed that topo II $\beta$  was able to substitute partially for topo II $\alpha$  in chromosome condensation and segregation. In addition, we show that topo II has a crucial role in the shortening of chromosome axes.

## Materials and Methods

### RNA preparation

21-nucleotide RNAs were purchased from JBioS (Saitama). The siRNAs targeting topo II $\alpha$  corresponded to the regions 76-96 ( $\alpha$  siRNA-1) and 122-142 ( $\alpha$  siRNA-2), and the siRNAs targeting topo II $\beta$  corresponded to the regions 73-93 ( $\beta$  siRNA-1) and 86-106 ( $\beta$  siRNA-2) relative to the first nucleotide of the start codon.

### Cell culture and transfection

HeLa cells were grown at 37°C in Dulbecco's modified Eagle's medium, supplemented with 10% fetal bovine serum (FBS), 100 units ml<sup>-1</sup> penicillin and 100 mg ml<sup>-1</sup> streptomycin. The day before transfection, cells were trypsinized, diluted with fresh medium without antibiotics and transferred to 35 mm dishes. Transient transfection of siRNAs was carried out using Oligofectamine (Invitrogen). 12  $\mu$ l OPTIMEM 1 medium (Invitrogen) and 4  $\mu$ l

Oligofectamine per dish were preincubated for 5 minutes at room temperature. During this incubation, 170  $\mu$ l OPTIMEM 1 medium was mixed with 10  $\mu$ l of 20  $\mu$ M siRNA. The two mixtures were combined and incubated for 20 minutes to allow complex formation. The entire mixture was added to the cells and, 4 hours later, 300  $\mu$ l FBS was also added.

#### Immunoblotting and immunofluorescence microscopy

Topo II $\alpha$ -specific monoclonal antibody (mAb), 8D2, and topo II $\beta$ -specific mAbs, 1A5 and 3B6, were used at 1/20 or 1/50 dilution in hybridoma supernatant for immunofluorescence and 1/50 dilution for immunoblotting (Sakaguchi et al., 2002). The antibodies 6H8 and 7B9, which recognize both topo II $\alpha$  and  $\beta$ , were used in the same way. Tubulin-specific mAb, YL1/2 (Serotec), and nuclear pore complex protein-specific antibody (BabCO) were used for immunofluorescence at 1/50 and 1/1000 dilutions, respectively. The methods for immunoblotting and immunofluorescence were as described previously (Sakaguchi et al., 2002). Cells were mounted in Vectashield with 4, 6-diamidino-2-phenylindole (DAPI; Vector Labs) and examined with an epifluorescence microscope (Olympus BX-60) using U-MWIG for rhodamine, U-MWIB/GFP for FITC and U-MWU for DAPI filters, respectively. Images were acquired with an ORCA-ER CCD camera (HAMAMATSU, Japan) equipped with IP Lab software (Scanalytics Corp).

#### LSC2 measurements

Transfected cells grown on Akura films (Nisshin EM) were fixed in 100% ethanol for 1 hour at 4°C. After being rinsed well in PBS, they were incubated with RNase (1 mg ml<sup>-1</sup>; Sigma) for 1 hour at 37°C. The films were dipped in a 50 mg ml<sup>-1</sup> solution of propidium iodide (PI; Sigma) and mounted in PermaFluor Mounting Medium (Shandon).

DNA content was measured using a laser scanning cytometer (LSC2; Olympus). Three parameters were employed to define nuclear characteristics, namely nuclear area, fluorescence value and fluorescence peak; we show data using two-parameter dots of possible permutations of these three parameters. The fluorescence value corresponds to nuclear DNA content; the fluorescence peak represents the state of chromosome condensation (Kawasaki et al., 1997).

#### DNA topoisomerase II assay

Extracts for topo II assay were prepared from 4 $\times$ 10<sup>5</sup> cells 3 days after transfection with siRNAs, as described in 'Small Scale Preparation of Topo I and II Extracts from Tissue Culture Cells (Optimized for HeLa Cells)' on the TopoGEN website (<http://www.topogen.com/html/extracts.html>). Topo II activity was measured by a decatenation assay using kinetoplast DNA as a substrate (topoisomerase II assay kit; TopoGEN) according to the manufacturer's instructions. Decatenation products were analyzed by agarose gel electrophoresis using 1.0% agarose in TBE buffer (89 mM Tris borate, pH 8.2, 2 mM EDTA). One unit activity of topo II decatenates 0.2  $\mu$ g of kinetoplast DNA in 30 minutes.

#### Chromosome preparation

For metaphase chromosome spreading, cells grown on Akura films in 35 mm dishes were washed once in PBS and soaked in a hypotonic solution of 0.075 M KCl for 5 minutes at room temperature. Metaphase chromosomes were spread by centrifugation for 5 minutes at 2000 rpm. Cells were fixed in freshly prepared 4% paraformaldehyde in PBS for 20 minutes at room temperature before examination using immunofluorescence procedures.

To measure the condensation of each chromosome, cells were incubated in 0.05  $\mu$ g ml<sup>-1</sup> nocodazole (Sigma) for 2 hours, then

treated with 0.075 M KCl hypotonic solution for 20 minutes at 37°C before fixation with acetic acid:cooled methanol (1:3). An aliquot of the cell suspension (about 0.1 ml) containing approximately 1 $\times$ 10<sup>4</sup> mitotic cells was taken up into a syringe (1 ml) with a 22-gauge needle, and the cells were ruptured by pumping at least 10 times. The single-chromosome suspensions were then spread on Akura films, air-dried and analyzed under the fluorescent microscope.

## Results

### Knockdown of each topo II isoform

Two RNA duplexes of 21 nucleotides in length for each of topo II $\alpha$  ( $\alpha$  siRNA-1 and  $\alpha$  siRNA-2) and topo II $\beta$  ( $\beta$  siRNA-1 and  $\beta$  siRNA-2) cDNAs were prepared. HeLa cells were transfected with each siRNA, or mock transfected with buffer, and cells were assayed 2, 3 and 4 days after transfection by immunoblotting (Fig. 1A,B). Transfection with  $\alpha$  siRNA-1 or  $\alpha$  siRNA-2 resulted in specific silencing of topo II $\alpha$  but not of topo II $\beta$  (Fig. 1A). Most endogenous topo II $\alpha$  disappeared between the second and the fourth days after transfection with  $\alpha$  siRNA-1, and optimal silencing of topo II $\alpha$  was reached on the third day after transfection. To quantify the remaining topo II $\alpha$  protein, crude extracts from cells on the third day after transfection with  $\alpha$  siRNA-1 were assayed by immunoblotting together with 1/5, 1/10, 1/20, 1/40 and 1/80 dilutions of extracts from control cells. The remaining level of topo II $\alpha$  corresponded to about 4.2 $\pm$ 0.3% of the control value. Similarly, most topo II $\beta$  disappeared over the same period after transfection with  $\beta$  siRNA-2 (Fig. 1B), and optimal silencing of topo II $\beta$  was also reached on the third day after transfection. The remaining level of topo II $\beta$  protein corresponded to about 3.8 $\pm$ 2.1% of the control value. Gene silencing was also confirmed by immunofluorescence. The topo II $\alpha$ -specific mAb 8D2 (Sakaguchi et al., 2002) stains both mitotic and interphase nuclei in control cells; in cells transfected with  $\alpha$  siRNA-1, most nuclei were not stained and only nonspecific fluorescence was seen throughout the cytoplasm (Fig. 1C, upper panel). On the third day after transfection, 92 of 1254 nuclei were stained by 8D2, indicating that the efficiency of  $\alpha$  siRNA-1 transfection was approximately 92.7%. In the same manner, silencing by  $\beta$  siRNA-2 was confirmed using the topo II $\beta$ -specific mAb 1A5 (Sakaguchi et al., 2002); the efficiency of  $\beta$  siRNA-2 transfection was approximately 94.2% (Fig. 1C, lower panel).

### Topo II $\alpha$ -knockdown cells are delayed in early mitotic stages

The DNA content of control and topo II-knockdown cells was measured on the third day after transfection, when the silencing of topo II by either  $\alpha$  siRNA-1 or  $\beta$  siRNA-2 was highly efficient. DNA content was measured using a laser scanning cytometer (LSC2; Olympus), which functions as both a fluorescence microscope and a cytometer (Darzynkiewicz et al., 1999; Kametsky and Kametsky, 1991). The upper panels of Fig. 2B show the fluorescence values and the peak values of each PI-stained body; the sum of the number of spots of each value range is shown in the histogram of DNA content for each spot (Fig. 2B, lower panels). Using LSC2, cells can be sorted into cell-cycle stages (Kawasaki et al., 1997); cells in the red boxes are in prophase and metaphase, and those in the blue boxes are in anaphase and telophase (Fig. 2A).

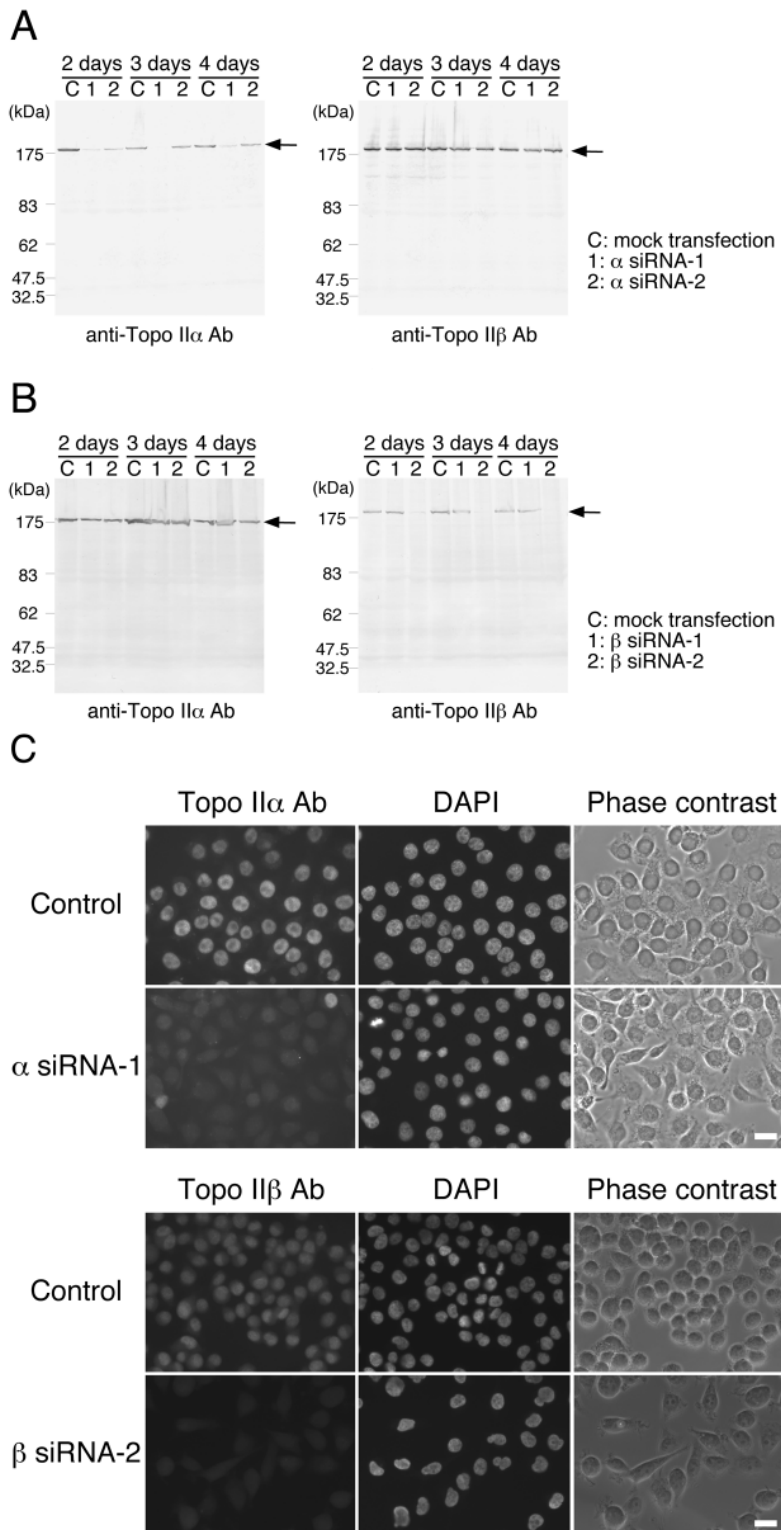

**Fig. 1.** Knockdown of each topo II isoform by siRNA. (A,B) HeLa cells were transfected with  $\alpha$  siRNA-1 (A1),  $\alpha$  siRNA-2 (A2),  $\beta$  siRNA-1 (B1) and  $\beta$  siRNA-2 (B2) or buffer as a control (A and B; C). Cells were assayed on the second, third and fourth days after transfection by immunoblotting using the anti-topo II $\alpha$  antibody 8D2 (left panels) and the anti-topo II $\beta$  antibody 3B6 (right panels). (C) Gene silencing was also confirmed by immunofluorescence using the anti-topo II $\alpha$  antibody 8D2 (for  $\alpha$  siRNA-1-knockdown cells, upper panels) or the anti-topo II $\beta$  antibody 1A5 (for  $\beta$  siRNA-2-knockdown cells, lower panels); cells were also stained with DAPI. Ab: antibody. Bar, 20  $\mu$ m.

In topo II $\alpha$ -knockdown cells, the population of cells in prophase or metaphase was greater than that of control cells (Fig. 2B, red boxes). Whereas the proportion of mitotic cells was almost identical in the control and topo II $\alpha$ -knockdown populations, the proportions of cells in prophase/metaphase and anaphase/telophase were different (Fig. 2B, table). In topo II $\alpha$ -knockdown cells, the population of cells in prophase/metaphase was about 80% of total mitotic cells; by contrast, in control cells, it was about 60%. In addition, the 2C peak position of topo II $\alpha$ -knockdown cells was higher than that of control cells. In control and topo II $\alpha$ -knockdown cells, the 2C peak comprised 22.0 and 34.1% of total cells, respectively (Fig. 2B, lower table), indicating that there is also an increase in the number of cells in G2 phase in topo II $\alpha$ -knockdown cells. These results suggest that topo II $\alpha$ -knockdown cells are delayed in the early mitotic stages relative to normal topo II $\alpha$ -expressing cells. By contrast, we found that the knockdown of topo II $\beta$  did not appear to have any effect on the cell cycle.

#### Chromosome segregation in topo II $\alpha$ -knockdown cells

Control (Fig. 3A) and topo II $\alpha$ -knockdown cells (Fig. 3B) were stained with DAPI, topo II $\alpha$ -specific mAb (8D2) and tubulin-specific mAb (YL1/2) on the third day after transfection. The chromosomes were condensed and the mitotic spindles were assembled in topo II $\alpha$ -knockdown cells (Fig. 3Bb). However, in some topo II $\alpha$ -knockdown cells, the alignment of metaphase chromosomes was distorted and their segregation towards daughter cells was affected, which may be indicative of difficulties in chromosome segregation (Fig. 3Bc). In addition, whereas compact chromosomes were maintained until telophase in control cells (Fig. 3Ac), the chromosomes of topo II $\alpha$ -knockdown cells became slightly thicker and less compact in the meta-anaphase (Fig. 3Bd,e). Although some lagging chromosomes were observed, they still managed to separate (Fig. 3Bf). In some topo II $\alpha$ -knockdown cells, the two daughter nuclei were connected by a thread of DNA (Fig. 3C, arrowheads); this connection remained until the G1 phase, when the nuclear lamina reformed (Fig. 3D). In control cells, we seldom saw such threads of DNA. Among all topo II $\alpha$ -knockdown cells, 21.4% were connected by DNA (Fig. 3E). The DNA content of connected nuclei was measured using the LSC2: we found that DNA was evenly partitioned in the 75.2% of all connected nuclei. Therefore, even in the near absence of topo II $\alpha$ , most chromosomes can segregate evenly; however, the catenanes of intertwined DNAs cannot be removed completely at the onset of G1 phase.

#### Topo II $\beta$ partially substitutes for topo II $\alpha$ in chromosome segregation

To investigate whether topo II $\beta$  could substitute for

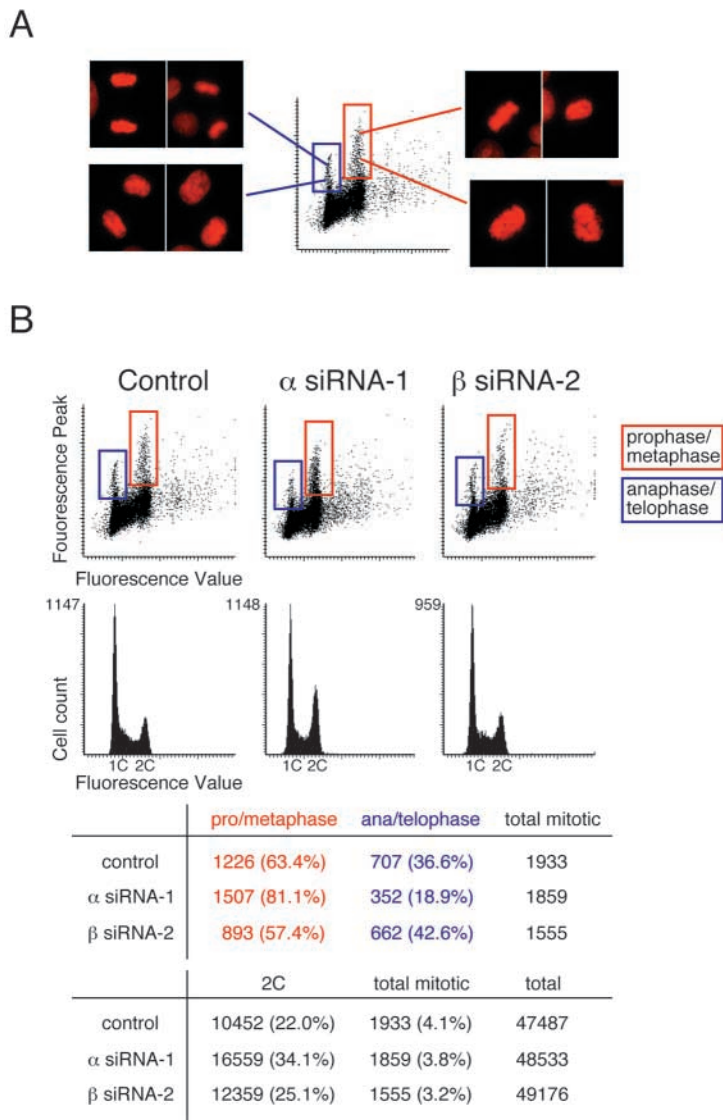

**Fig. 2.** Cell-cycle analysis using the LSC2. (A) Using LSC2, cells can be sorted into cell-cycle stages (Kawasaki et al., 1997). Cells in red boxes are at prophase and metaphase, and those in blue boxes are at anaphase and telophase. (B) Topo II $\alpha$ -knockdown, topo II $\beta$ -knockdown and mock-transfected cells were sorted using the LSC2 3 days after transfection (plots). The tables show the number of cells in each category; red boxes correspond to prophase/metaphase cells, blue boxes to anaphase/telophase cells, 2C to G2 phase cells and 'total mitotic' is the sum of prophase/metaphase and anaphase/telophase cells. Each transfection was repeated independently at least three times and samples were prepared in four separate Akura films for every experiment.

topo II $\alpha$  in the topo II $\alpha$ -deficient cells, the expression of both topo II $\alpha$  and topo II $\beta$  was knocked down simultaneously. HeLa cells were transfected with both  $\alpha$  siRNA-1 and  $\beta$  siRNA-2, resulting in the silencing of both topo II $\alpha$  and topo II $\beta$  (Fig. 4A). The levels of topo II $\alpha$  and topo II $\beta$  remaining on the third day after transfection corresponded to approximately  $4.3 \pm 0.7\%$  and  $3.6 \pm 0.2\%$  of the control values, respectively.

By immunofluorescent staining of topo II $\alpha\beta$ -knockdown cells, the number of topo II $\alpha$ -positive cells as seen in the upper right corner in Fig. 4C seems to account for the larger

proportion (285/1185) than that in the single topo II $\alpha$ -knockdown case (92/1254; Fig. 1C). Immunostaining with isoform-specific antibodies was also carried out; 19.1% (233/1218) were topo II $\alpha$ -positive cells, whereas 18.5% (180/971) were topo II $\beta$ -positive cells. This large difference between single- and double-knockdown experiments is because, in the first case, the cells continue to divide, whereas most of the topo II $\alpha\beta$ -knockdown cells could not divide any further and the number of the cells did not increase. In topo II $\alpha\beta$ -knockdown cells, the 2C population increased dramatically and a large 4C peak appeared (Fig. 4B). As shown by DAPI staining (Fig. 4C, upper panel), many large and multi-lobed nuclei were observed and it was confirmed by LSC2 measurements that most of these were 4C, indicating that these cells were a result of the failure of chromosome segregation. Some cells were observed in which nearly all of the chromosomes were segregated into one of the two daughter cells (Fig. 4C, lower panel). We therefore concluded that double-knockdown cells were unable to segregate chromosomes to daughter cells. Because they managed to separate in topo II $\alpha$ -knockdown cells, this result suggests that, in topo II $\alpha$ -knockdown cells, topo II $\beta$  can assume the essential catalytic roles required for chromosome segregation.

#### The enzymatic activity of topo II in knockdown cells

The use of siRNAs enabled us to eliminate the activities of topo II $\alpha$  or topo II $\beta$  individually. The absence of topo II in knockdown cells was shown by both immunoblotting and immunostaining. To confirm the absence of topo II, its enzymatic activity in knockdown cells was analyzed by an ATP-dependent decatenation assay using kinetoplast DNA as a substrate (Fig. 5). We inoculated  $4 \times 10^5$  cells and prepared extracts for the topo II assay from cells 3 days after transfection. In the presence of ATP, the products of topo II decatenation activity appear as two bands on agarose gels. The topo II activity in crude extract from control cells was found to be  $1.38 \times 10^4$  units  $\text{mg}^{-1}$  protein (1 unit of topo II activity can decatenate 0.2  $\mu\text{g}$  of kinetoplast DNA in 30 minutes.) (Fig. 5A). The topo II activities in topo II $\alpha$ - and topo II $\alpha\beta$ -knockdown cell extracts were  $1.72 \times 10^3$  and  $0.86 \times 10^3$  units  $\text{mg}^{-1}$ , respectively, which correspond to 12.5% and 6.23-9.35% of the activity of the control cells (Fig. 5B,C). Compared with the difference in the activity of control and topo II $\alpha$ -knockdown cells, only a small difference was detected between topo II $\alpha$ - and topo II $\alpha\beta$ -knockdown cells. Additionally, immunoblotting showed that the relative protein level of topo II $\beta$  was about 13.0% of topo II $\alpha$  (Fig. 5D), indicating that most of the residual decatenating activity in topo II $\alpha\beta$ -knockdown cells must be owing to the activity of topo II $\alpha$ . The residual topo II decatenation activity in topo II $\alpha\beta$ -knockdown cells was approximately 6.23-9.35% of the topo II activity in mock-transfected cells, which corresponds to the proportion of cells stained by anti-topo II $\alpha$  antibody in Fig. 1C (Note that in the cell mass used in the topo II assay, about 7% of cells were topo II $\alpha$ -positive.) The remaining activities of topo II in topo II $\alpha$ - and topo II $\alpha\beta$ -knockdown cells were at a similar level. Nevertheless, the phenotype of topo II $\alpha\beta$ -knockdown cells was quite different

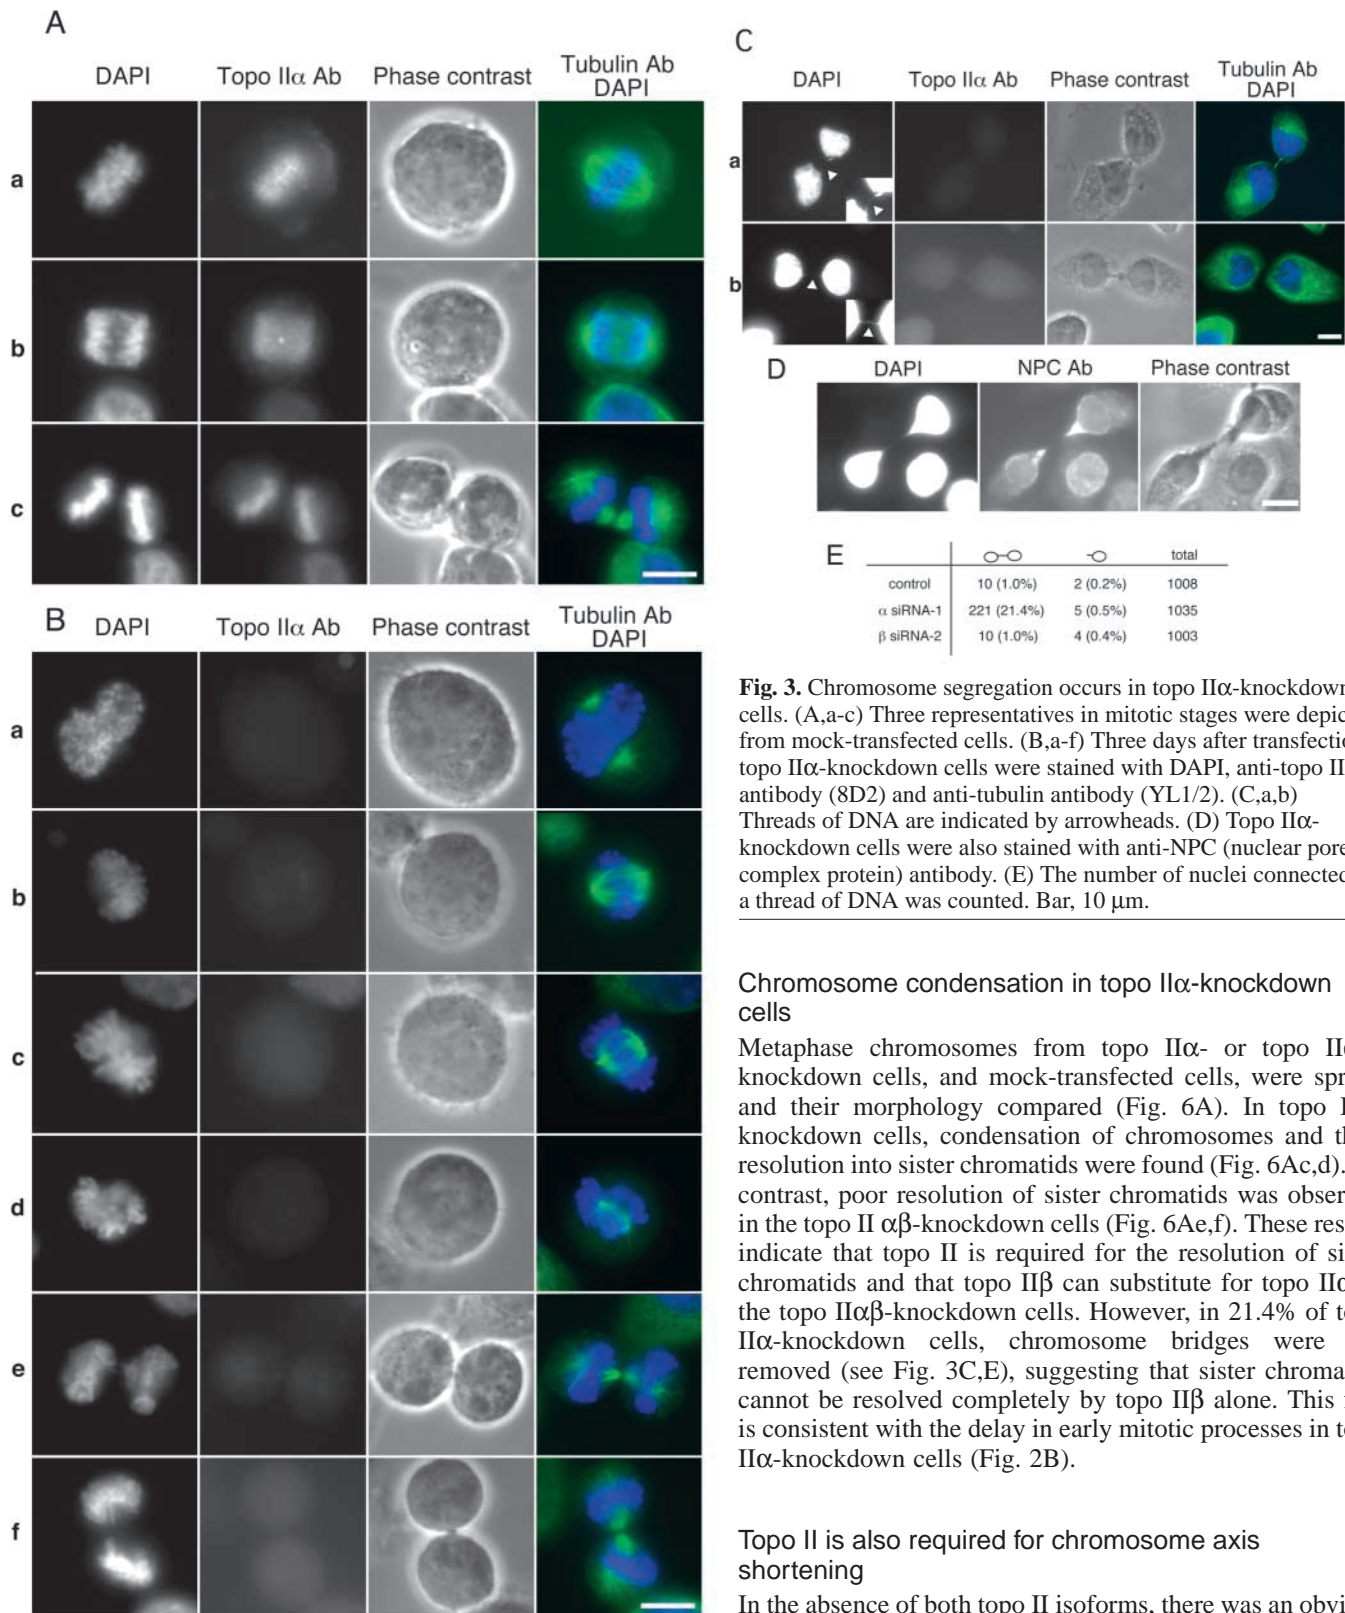

**Fig. 3.** Chromosome segregation occurs in topo II $\alpha$ -knockdown cells. (A,a-c) Three representatives in mitotic stages were depicted from mock-transfected cells. (B,a-f) Three days after transfection, topo II $\alpha$ -knockdown cells were stained with DAPI, anti-topo II $\alpha$  antibody (8D2) and anti-tubulin antibody (YL1/2). (C,a,b) Threads of DNA are indicated by arrowheads. (D) Topo II $\alpha$ -knockdown cells were also stained with anti-NPC (nuclear pore complex protein) antibody. (E) The number of nuclei connected by a thread of DNA was counted. Bar, 10  $\mu$ m.

#### Chromosome condensation in topo II $\alpha$ -knockdown cells

Metaphase chromosomes from topo II $\alpha$ - or topo II $\beta$ -knockdown cells, and mock-transfected cells, were spread and their morphology compared (Fig. 6A). In topo II $\alpha$ -knockdown cells, condensation of chromosomes and their resolution into sister chromatids were found (Fig. 6Ac,d). By contrast, poor resolution of sister chromatids was observed in the topo II  $\alpha\beta$ -knockdown cells (Fig. 6Ae,f). These results indicate that topo II is required for the resolution of sister chromatids and that topo II $\beta$  can substitute for topo II $\alpha$  in the topo II $\alpha\beta$ -knockdown cells. However, in 21.4% of topo II $\alpha$ -knockdown cells, chromosome bridges were not removed (see Fig. 3C,E), suggesting that sister chromatids cannot be resolved completely by topo II $\beta$  alone. This fact is consistent with the delay in early mitotic processes in topo II $\alpha$ -knockdown cells (Fig. 2B).

#### Topo II is also required for chromosome axis shortening

In the absence of both topo II isoforms, there was an obvious defect in the resolution of chromosomes (Fig. 6Ae). Chromosome condensation can be divided into two components, namely the resolution of sister chromatids and the shortening of the longitudinal axis of the chromosome (Steffensen et al., 2001). To investigate whether double-knockdown cells also have defects in chromosome axis

from that of single topo II $\alpha$ -knockdown cells. Therefore, it is reasonable to suppose that the different phenotype (i.e. whether chromosomes could separate to daughter cells or not) must be the direct consequence of the presence of topo II $\beta$  activity, rather than the residual amount of topo II $\alpha$ .

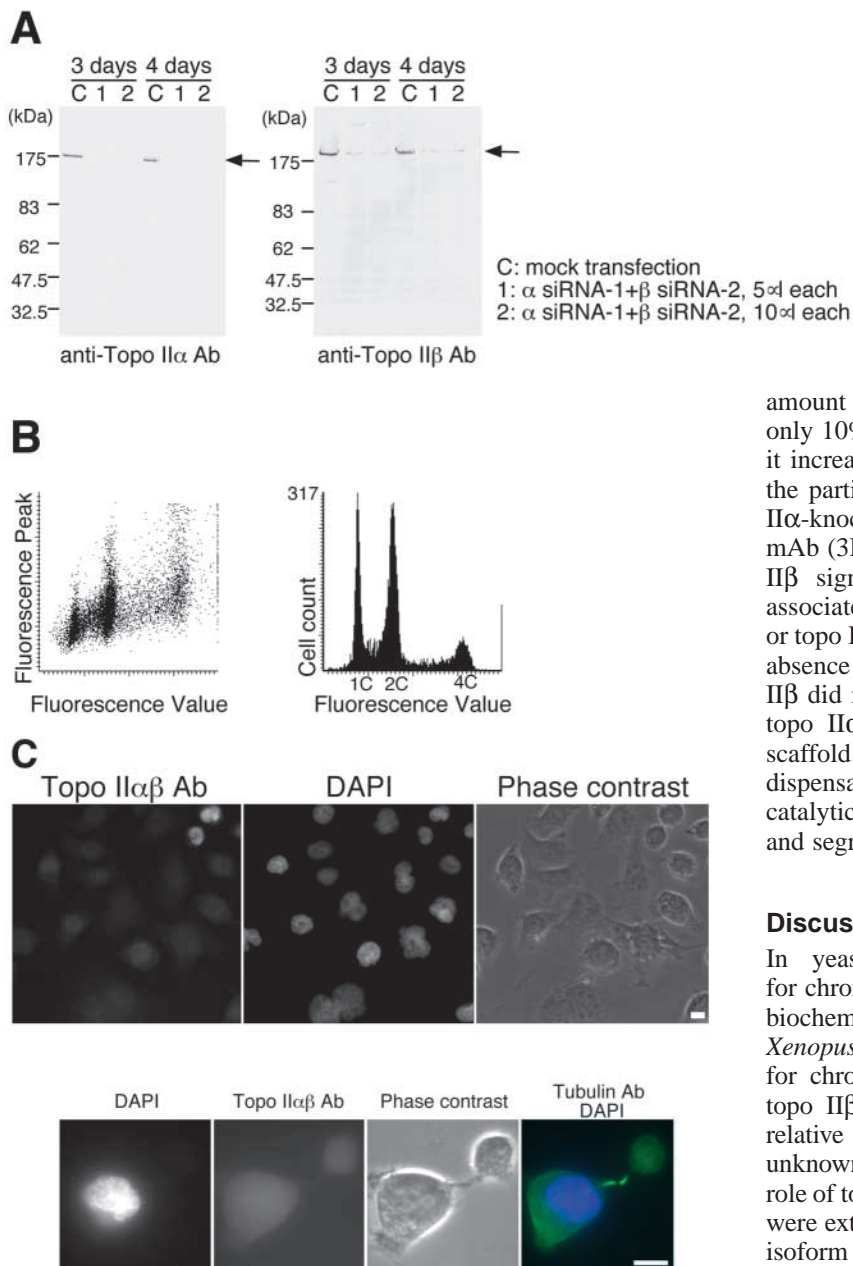

**Fig. 4.** Knockdown of both topo II isoforms by siRNAs. (A) HeLa cells were transfected with both  $\alpha$  siRNA-1 and  $\beta$  siRNA-2 (1; 5  $\mu$ l each siRNA was added per 35 mm dish; 2; 10  $\mu$ l each) or buffer as a control. Cells were assayed on the third or fourth day after transfection by immunoblotting using the anti-topo II $\alpha$  antibody 8D2 (left) and the anti-topo II $\beta$  antibody 3B6 (right). (B) The topo II $\alpha\beta$ -knockdown cells were analyzed using the LSC2 3 days after transfection. (C) Topo II $\alpha\beta$ -knockdown cells (3 days after transfection) were stained with DAPI, anti-topo II $\alpha\beta$  antibody (6H8) and anti-tubulin antibody (YL1/2). Bar in C, 20  $\mu$ m (upper panels) and 10  $\mu$ m (lower panels).

shortening, we measured the length of arms of metaphase chromosomes in control cells and that in topo II $\alpha\beta$ -knockdown cells (Fig. 6B). The average length of each axis of metaphase chromosomes in control cells was  $6.05 \pm 1.47$   $\mu$ m. By contrast, its axis length in topo II $\alpha\beta$ -knockdown cells was  $7.51 \pm 1.60$   $\mu$ m. Thus, the extent of axial compaction of metaphase

chromosomes in topo II $\alpha\beta$ -knockdown cells was clearly reduced, indicating that topo II is also required for the chromosome axis shortening as well as for the resolution of chromosomes.

#### The localization of topo II $\beta$ is mostly unchanged in topo II $\alpha$ -knockdown cells

To investigate how topo II $\beta$  substitutes the roles of topo II $\alpha$  in its absence, we examined the quantity and localization of topo II $\beta$ . It is noticed from the right panel of Fig. 1A, the amount of topo II $\beta$  protein, which usually accounts for only 10% of total topo II protein, did not change, nor did it increase after the knockdown of topo II $\alpha$ . To examine the particular localization change, both control and topo II $\alpha$ -knockdown cells were stained with topo II $\beta$ -specific mAb (3B6) (Fig. 7). In mitotic cells, the majority of topo II $\beta$  signal diffused into the cytoplasm and was not associated with metaphase chromosomes in either control or topo II $\alpha$ -knockdown cells. This result shows that, in the absence of topo II $\alpha$ , the localization of the bulk of topo II $\beta$  did not change during the cell cycle to substitute for topo II $\alpha$  as the major constituent of the chromosome scaffold. Therefore, we suggest that topo II $\alpha$  might be dispensable in the chromosome scaffold but that its catalytic activity is essential for chromosome condensation and segregation.

#### Discussion

In yeast, a single copy of topo II is essential for chromosome segregation (Uemura et al., 1987). In the biochemical and immunological depletion study of *Xenopus* egg extracts, topo II $\alpha$  was shown to be required for chromosome condensation, whereas the function of topo II $\beta$  remained obscure because its localization and relative amount to topo II $\alpha$  in the egg extracts were unknown (Hirano and Mitchison, 1993). In mammals, the role of topo II $\alpha$  and topo II $\beta$ , and their cellular localization, were extensively studied using specific mAbs against each isoform (Cobb et al., 1999; Tsutsui et al., 2001; Turley et al., 1997; Yabuki et al., 1996). This idea was challenged by the recent observation that there might exist residual but sizable amounts of heterodimers of topo II $\alpha$ /topo II $\beta$  in the cultured cell extract (Christensen et al., 2002).

The knocking-out of topo II $\beta$  does not affect embryonic development because topo II $\alpha$  can substitute for it until the birth of the fetus (Yang et al., 2000), indicating that topo II $\beta$  might be dispensable in cell proliferation. The knocking-out of topo II $\alpha$  causes early embryonic death (Akimitsu et al., 2003) and the activity of topo II $\beta$ , if there is any, cannot sufficiently compensate for the absence of topo II $\alpha$ . In cultured HeLa cells, this may not be the case.

Although 90% of topo II $\alpha$  was removed by specific siRNA, cells continued to divide. In these cells, we could not detect any signal of topo II $\alpha$  in the centromeric region and axis of each metaphase chromosome (Fig. 6Ad), nor could we detect any sign of dramatic relocation of topo II $\beta$  by immunofluorescent staining. In fact, topo II $\beta$  was dispersed into the cytoplasm after

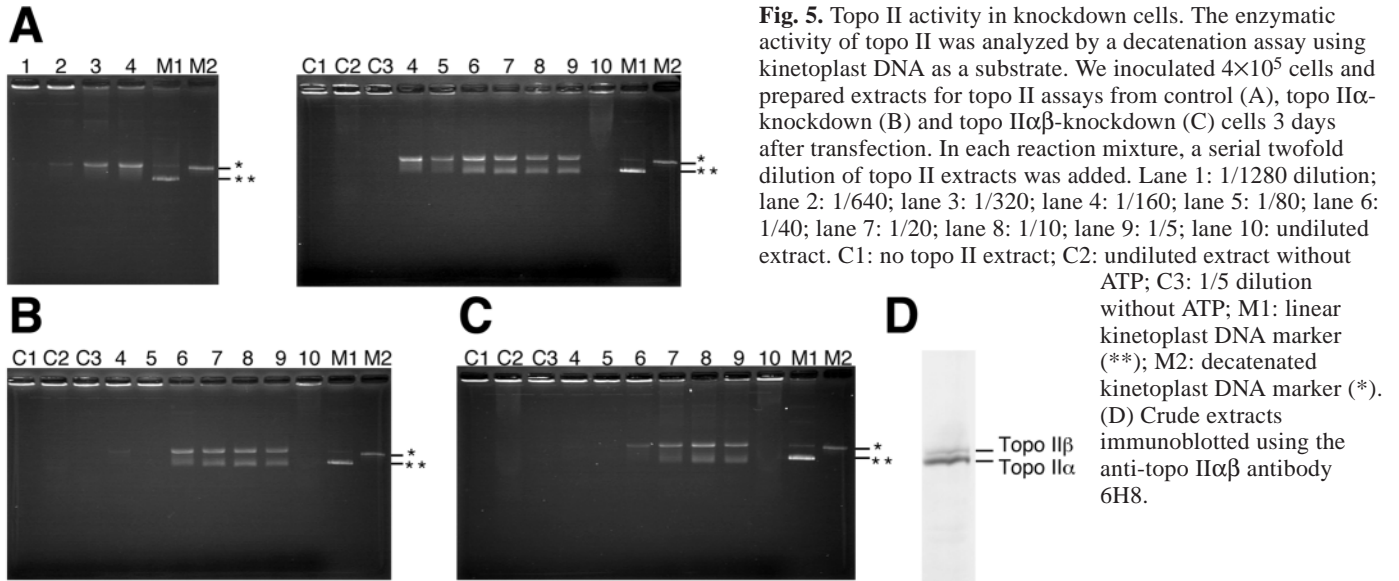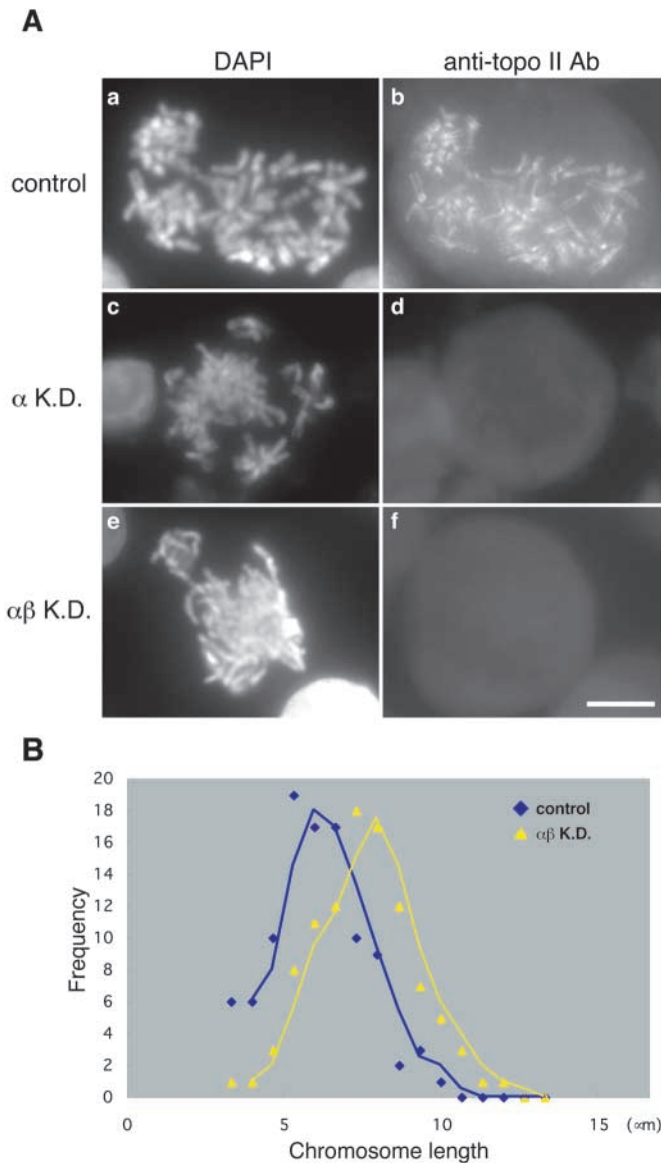

nuclear membrane breakdown in topo II $\alpha$ -knockdown cells (Fig. 7c,d), as in mock-transfected cells. The total amount of topo II $\beta$  did not change in the topo II $\alpha$ -knockdown cells (Fig. 1A). Thus, we might conclude that the majority of topo II $\alpha$  at the metaphase chromosomes could be dispensable for chromosome condensation and segregation. When topo II $\beta$  was removed from the topo II $\alpha$ -knockdown cells, we could detect several phenotypic changes, such as the appearance of 4C cells and anuclear cells, indicating that chromosome segregation was severely affected. Also, the metaphase chromosomes formed in these cells were morphologically altered. They were more slender and slightly longer by 10%. Thus, we could conclude that topo II $\beta$  partially substituted for topo II $\alpha$  deficiency in cell division, namely during chromosome condensation and segregation. It is also noticed here that we could still see the morphologically recognizable chromosomes in the double-knockdown cells (Fig. 6Ae), even if they were very sick, indicating that their formation does not require normal protein levels of topo II $\alpha$  or  $\beta$ .

In conclusion, we have demonstrated for the first time in cultured human cells the selective suppression of the expression of topo II $\alpha$ , topo II $\beta$  or topo II $\alpha$ /topo II $\beta$  using siRNAs, and that topo II $\alpha$  can be largely removed and yet chromosomes look normal and segregate reasonably well. Furthermore, the double-knockdown studies show that mitotic chromatin condensation and formation of morphologically recognizable mitotic chromosomes certainly does not require normal levels of topo II $\alpha$  or  $\beta$ . It seems to be true that, although the loss of topo II causes minor problems for mitotic chromosome structure, these chromosomes look remarkably normal compared with the attempts at chromosome

**Fig. 6.** Chromosome condensation and chromosome axis shortening. (A) Metaphase chromosomes of control (a,b), topo II $\alpha$ -knockdown (c,d) and topo II $\alpha\beta$ -knockdown (e,f) cells were spread and stained with DAPI (a,c,e) and the anti-topo II $\alpha\beta$  antibody 7B9 (b,f) or the anti-topo II $\alpha$  antibody 8D2 (d). In control cells, chromosome axes and centromeres were stained with anti-topo II $\alpha\beta$  antibody. Bar, 10  $\mu\text{m}$ . (B) Frequency distribution of the length of metaphase chromosomes in control cells and topo II $\alpha\beta$ -knockdown cells.

## Control cells

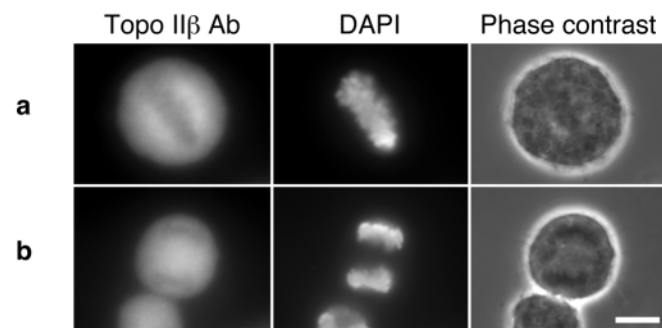Topo II $\alpha$ -knockdown cells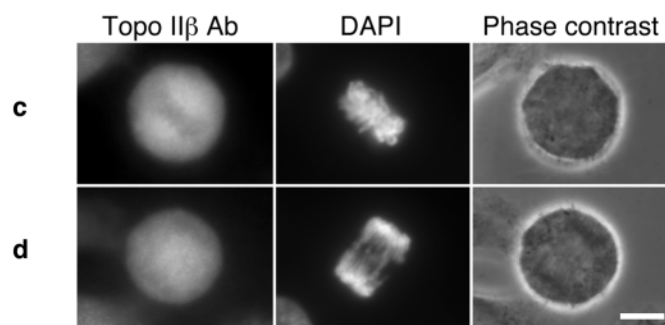

**Fig. 7.** Localization of topo II $\beta$  in mitotic chromosomes of topo II $\alpha$ -knockdown cells. Mitotic chromosomes of both control (a,b) and topo II $\alpha$ -knockdown (c,d) cells on the third day after transfection were stained with anti-topo II $\beta$  antibody (3B6) and DAPI. Bar, 10  $\mu$ m.

condensation in the absence of topo II obtained by Adachi and Laemmli (Adachi et al., 1991).

We thank K. Sekimizu and N. Akimitsu for discussions. We are particularly grateful to T. Akashi and W. Earnshaw for advice and discussions, and to K. Okada for his help in reproducing the knockdown experiment several times by himself. The topo II assay kit was a gift from M. Suzuki and N. Suda. We also thank Y. Kiyomatsu for technical advice on the LSC2. Part of this work was supported by grants from the Ministry of Education, Culture, Sports, Science and Technology, Japan. A.S. thanks the Ito Scholarship Foundation for their support.

## References

- Adachi, Y., Luke, M. and Laemmli, U. K. (1991). Chromosome assembly in vitro: topoisomerase II is required for condensation. *Cell* **64**, 137-148.
- Akimitsu, N., Adachi, N., Hirai, H., Hossain, M. S., Hamamoto, H., Kobayashi, M., Aratani, Y., Koyama, H. and Sekimizu, K. (2003). Enforced cytokinesis without complete nuclear division in embryonic cells depleting the activity of DNA topoisomerase II $\alpha$ . *Genes Cells* **8**, 393-402.
- Austin, C. A. and Marsh, K. L. (1998). Eukaryotic DNA topoisomerase II $\beta$ . *Bioessays* **20**, 215-226.
- Capranico, G., Tinelli, S., Austin, C. A., Fisher, M. L. and Zunino, F. (1992). Different patterns of gene expression of topoisomerase II isoforms in differentiated tissues during murine development. *Biochim. Biophys. Acta* **1132**, 43-48.
- Christensen, M. O., Larsen, M. K., Barthelmes, H. U., Hock, R., Andersen, C. L., Kjeldsen, E., Knudsen, B. R., Westergaard, O., Boege, F. and Mielke, C. (2002). Dynamics of human DNA topoisomerase II $\alpha$  and II $\beta$  in living cells. *J. Cell Biol.* **157**, 31-44.
- Cobb, J., Miyaike, M., Kikuchi, A. and Handel, M. A. (1999). Meiotic events at the centromeric heterochromatin: histone H3 phosphorylation, topoisomerase II  $\alpha$  localization and chromosome condensation. *Chromosoma* **108**, 412-425.
- Darzynkiewicz, Z., Bedner, E., Li, X., Gorkczyca, W. and Melamed, M. R. (1999). Laser-scanning cytometry: A new instrumentation with many applications. *Exp. Cell Res.* **249**, 1-12.
- De, D. N. (2002). Protein constitution of the chromosome axis. *Chromosoma* **111**, 69-79.
- Drake, F. H., Hofmann, G. A., Bartus, H. F., Mattern, M. R., Crooke, S. T. and Mirabelli, C. K. (1989). Biochemical and pharmacological properties of p170 and p180 forms of topoisomerase II. *Biochemistry* **28**, 8154-8160.
- Drake, F. H., Zimmerman, J. P., McCabe, F. L., Bartus, H. F., Per, S. R., Sullivan, D. M., Ross, W. E., Mattern, M. R., Johnson, R. K., Crooke, S. T. et al. (1987). Purification of topoisomerase II from amacrine-resistant P388 leukemia cells. Evidence for two forms of the enzyme. *J. Biol. Chem.* **262**, 16739-16747.
- Elbashir, S. M., Harborth, J., Lendeckel, W., Yalcin, A., Weber, K. and Tuschl, T. (2001). Duplexes of 21-nucleotide RNAs mediate RNA interference in cultured mammalian cells. *Nature* **411**, 494-498.
- Gorbsky, G. J. (1994). Cell cycle progression and chromosome segregation in mammalian cells cultured in the presence of the topoisomerase II inhibitors ICRF-187 [(+)-1,2-bis(3,5-dioxopiperazinyl-1-yl)propane; ADR-529] and ICRF-159 (Razoxane). *Cancer Res.* **54**, 1042-1048.
- Harborth, J., Elbashir, S. M., Beichert, K., Tuschl, T. and Weber, K. (2001). Identification of essential genes in cultured mammalian cells using small interfering RNAs. *J. Cell Sci.* **114**, 4557-4565.
- Hirano, T. and Mitchison, T. J. (1993). Topoisomerase II does not play a scaffolding role in the organization of mitotic chromosomes assembled in *Xenopus* egg extracts. *J. Cell Biol.* **120**, 601-612.
- Jenkins, J. R., Ayton, P., Jones, T., Davies, S. L., Simmons, D. L., Harris, A. L., Sheer, D. and Hickson, I. D. (1992). Isolation of cDNA clones encoding the  $\beta$  isozyme of human DNA topoisomerase II and localisation of the gene to chromosome 3p24. *Nucleic Acids Res.* **20**, 5587-5592.
- Kamentsky, L. A. and Kamentsky, L. D. (1991). Microscope-based multiparameter laser scanning cytometer yielding data comparable to flow cytometry data. *Cytometry* **12**, 381-387.
- Kawasaki, M., Sasaki, K., Satoh, T., Kurose, A., Kamada, T., Furuya, T., Murakami, T. and Todoroki, T. (1997). Laser scanning cytometry (LCS) allows detailed analysis of the cell cycle in PI stained human fibroblasts (TIG-7). *Cell Prolif.* **30**, 139-147.
- Sakaguchi, A., Akashi, T. and Kikuchi, A. (2001). A distinct subnuclear localization of mammalian DNA topoisomerase II $\beta$  in yeast. *Biochem. Biophys. Res. Commun.* **283**, 876-882.
- Sakaguchi, A., Miyaike, M., Kuroda, K., Nozaki, N., Tanaka, M., Hibino, M., Fujii, Y., Kato, S. and Kikuchi, A. (2002). Epitope distribution of randomly established monoclonal antibodies against human type II DNA topoisomerases. *J. Biochem. (Tokyo)* **132**, 409-416.
- Schneider, E., Hsiang, Y. H. and Liu, L. F. (1990). DNA topoisomerases as anticancer drug targets. *Adv. Pharmacol.* **21**, 149-183.
- Steffensen, S., Coelho, P. A., Cobbe, N., Vass, S., Costa, M., Hassan, B., Prokopenko, S. N., Bellen, H., Heck, M. M. and Sunkel, C. E. (2001). A role for *Drosophila* SMC4 in the resolution of sister chromatids in mitosis. *Curr. Biol.* **11**, 295-307.
- Tsutsui, K., Sano, K., Kikuchi, A. and Tokunaga, A. (2001). Involvement of DNA topoisomerase II $\beta$  in neuronal differentiation. *J. Biol. Chem.* **276**, 5769-5778.
- Turley, H., Comley, M., Houlbrook, S., Nozaki, N., Kikuchi, A., Hickson, I. D., Gatter, K. and Harris, A. L. (1997). The distribution and expression of the two isoforms of DNA topoisomerase II in normal and neoplastic human tissues. *Br. J. Cancer* **75**, 1340-1346.
- Uemura, T., Ohkura, H., Adachi, Y., Morino, K., Shiozaki, K. and Yanagida, M. (1987). DNA topoisomerase II is required for condensation and separation of mitotic chromosomes in *S. pombe*. *Cell* **50**, 917-925.
- Wang, J. C. (1996). DNA topoisomerases. *Annu. Rev. Biochem.* **65**, 635-692.
- Woessner, R. D., Mattern, M. R., Mirabelli, C. K., Johnson, R. K. and Drake, F. H. (1991). Proliferation- and cell cycle-dependent differences in expression of the 170 kilodalton and 180 kilodalton forms of topoisomerase II in NIH-3T3 cells. *Cell Growth Differ.* **2**, 209-214.
- Yabuki, N., Sasano, H., Kato, K., Ohara, S., Toyota, T., Nagura, H., Miyaike, M., Nozaki, N. and Kikuchi, A. (1996). Immunohistochemical study of DNA topoisomerase II in human gastric disorders. *Am. J. Pathol.* **149**, 997-1007.
- Yang, X., Li, W., Prescott, E. D., Burden, S. J. and Wang, J. C. (2000). DNA topoisomerase II $\beta$  and neural development. *Science* **287**, 131-134.
